# Supplementary material for: From Anti-SARS-CoV-2 Immune Response to the Cytokine Storm via Molecular Mimicry
Source: MDPI journal article supplement (doi:10.3390/antib10040036), 2021-09-24
Supplement: s1 [file s1]

**Table S1.** List of 219 human proteins assembled at random from UniprotKB database by using “anti-inflammatory” as keyword. Proteins given by Uniprot entry and name.

---

|                                                                       |
|-----------------------------------------------------------------------|
| 5HT4R. 5-hydroxytryptamine receptor 4                                 |
| 5HT6R. 5-hydroxytryptamine receptor 6                                 |
| 5HT7R. 5-hydroxytryptamine receptor 7                                 |
| AA2AR. Adenosine receptor A2a                                         |
| AA2BR. Adenosine receptor A2b                                         |
| ACTHR. Adrenocorticotrophic hormone receptor                          |
| ADA17. Disintegrin and metalloproteinase domain-containing protein 17 |
| ADCY1. Adenylate cyclase type 1                                       |
| ADCY2. Adenylate cyclase type 2                                       |
| ADCY3. Adenylate cyclase type 3                                       |
| ADCY4. Adenylate cyclase type 4                                       |
| ADCY5. Adenylate cyclase type 5                                       |
| ADCY6. Adenylate cyclase type 6                                       |
| ADCY7. Adenylate cyclase type 7                                       |
| ADCY8. Adenylate cyclase type 8                                       |
| ADCY9. Adenylate cyclase type 9                                       |
| ADIPO. Adiponectin                                                    |
| ADM2. Protein ADM2                                                    |
| ADML. Pro-adrenomedullin                                              |
| ADRB1. Beta-1 adrenergic receptor                                     |
| ADRB2. Beta-2 adrenergic receptor                                     |
| ADRB3. Beta-3 adrenergic receptor                                     |
| AIM2. Interferon-inducible protein AIM2                               |
| AK1C3. Aldo-keto reductase family 1 member C3                         |
| AMACR. Alpha-methylacyl-CoA racemase                                  |
| ANXA1. Annexin A1                                                     |
| ASIC1. Acid-sensing ion channel 1                                     |
| ASIC2. Acid-sensing ion channel 2                                     |
| ASIC3. Acid-sensing ion channel 3                                     |
| C163A. Scavenger receptor cysteine-rich type 1 protein M130           |
| C1QT4. Complement C1q tumor necrosis factor-related protein 4         |
| CALC. Calcitonin                                                      |
| CALCA. Calcitonin gene-related peptide 1                              |
| CALCB. Calcitonin gene-related peptide 2                              |
| CALCR. Calcitonin receptor                                            |
| CALRL. Calcitonin gene-related peptide type 1 receptor                |
| CCN3. CCN family member 3                                             |
| CDK9. Cyclin-dependent kinase 9                                       |
| CLTR2. Cysteinyl leukotriene receptor 2                               |
| COLI. Pro-opiomelanocortin                                            |

---

---

CP4F2. Cytochrome P450 4F2  
CP4F3. Cytochrome P450 4F3  
CREB1. Cyclic AMP-responsive element-binding protein 1  
CRF. Corticotiberin  
CRFR1. Corticotropin-releasing factor receptor 1  
CSF1R. Macrophage colony-stimulating factor 1  
CXL17. C-X-C motif chemokine 17  
DP13B. DCC-interacting protein 13-beta  
DRD1. D(1A) dopamine receptor  
DRD5. D(1B) dopamine receptor  
FFAR1. Free fatty acid receptor 1  
FFAR4. Free fatty acid receptor 4  
FNDC4. Fibronectin type III domain-containing protein 4  
FPR2. N-formyl peptide receptor 2  
FSHB. Folitropin subunit beta  
FSHR. Follicle-stimulating hormone receptor  
FURIN. Furin  
GBB1. Guanine nucleotide-binding protein G(I)/G(S)/G(T) subunit beta-1  
GBB2. Guanine nucleotide-binding protein G(I)/G(S)/G(T) subunit beta-2  
GBB3. Guanine nucleotide-binding protein G(I)/G(S)/G(T) subunit beta-3  
GBB4. Guanine nucleotide-binding protein subunit beta-4  
GBG1. Guanine nucleotide-binding protein G(T) subunit gamma-T1  
GBG10. Guanine nucleotide-binding protein G(I)/G(S)/G(O) subunit gamma-10  
GBG11. Guanine nucleotide-binding protein G(I)/G(S)/G(O) subunit gamma-11  
GBG12. Guanine nucleotide-binding protein G(I)/G(S)/G(O) subunit gamma-12  
GBG13. Guanine nucleotide-binding protein G(I)/G(S)/G(O) subunit gamma-13  
GBG2. Guanine nucleotide-binding protein G(I)/G(S)/G(O) subunit gamma-2  
GBG3. Guanine nucleotide-binding protein G(I)/G(S)/G(O) subunit gamma-3  
GBG4. Guanine nucleotide-binding protein G(I)/G(S)/G(O) subunit gamma-4  
GBG5. Guanine nucleotide-binding protein G(I)/G(S)/G(O) subunit gamma-5  
GBG7. Guanine nucleotide-binding protein G(I)/G(S)/G(O) subunit gamma-7  
GBG8. Guanine nucleotide-binding protein G(I)/G(S)/G(O) subunit gamma-8  
GBGT2. Guanine nucleotide-binding protein G(I)/G(S)/G(O) subunit gamma-T2  
GDE1. Glycerophosphodiester phosphodiesterase 1  
GHRHR. Growth hormone-releasing hormone receptor  
GIP. Gastric inhibitory polypeptide  
GIPR. Gastric inhibitory polypeptide receptor  
GLHA. Glycoprotein hormones alpha chain  
GLP1R. Glucagon-like peptide 1 receptor  
GLP2R. Glucagon-like peptide 2 receptor  
GLUC. Pro-glucagon  
GNAI1. Guanine nucleotide-binding protein G(i) subunit alpha-1  
GNAI2. Guanine nucleotide-binding protein G(i) subunit alpha-2

---

---

GNAI3. Guanine nucleotide-binding protein G(i) subunit alpha-3  
GNAS1. Guanine nucleotide-binding protein G(s) subunit alpha isoforms XLas  
GNAS2. Guanine nucleotide-binding protein G(s) subunit alpha isoforms short  
GNAT3. Guanine nucleotide-binding protein G(t) subunit alpha-3  
GNAZ. Guanine nucleotide-binding protein G(z) subunit alpha  
GNB5. Guanine nucleotide-binding protein subunit beta-5  
GP150. Probable G-protein coupled receptor 150  
GP176. G-protein coupled receptor 176  
GPBAR. G-protein coupled bile acid receptor 1  
GPHA2. Glycoprotein hormone alpha-2  
GPHB5. Glycoprotein hormone beta-5  
GPR15. G-protein coupled receptor 15  
GPR20. G-protein coupled receptor 20  
GPR25. Probable G-protein coupled receptor 25  
GPR27. Probable G-protein coupled receptor 27  
GPR32. Probable G-protein coupled receptor 32  
GPR39. G-protein coupled receptor 39  
GPR45. Probable G-protein coupled receptor 45  
GPR83. Probable G-protein coupled receptor 83  
GPR84. G-protein coupled receptor 84  
GPS2. G protein pathway suppressor 2  
GSTM4. Glutathione S-transferase Mu 4  
HMR1. Major histocompatibility complex class I-related gene protein  
HRH2. Histamine H2 receptor  
I10R1. Interleukin-10 receptor subunit alpha  
I36RA. Interleukin-36 receptor antagonist protein  
IAPP. Islet amyloid polypeptide  
IF16. Gamma-interferon-inducible protein 16  
IL10. Interleukin-10  
IL27A. Interleukin-27 subunit alpha  
IL27B. Interleukin-27 subunit beta  
IL37. Interleukin-37  
IL6. Interleukin-6  
IL6RA. Interleukin-6 receptor subunit alpha  
INSL3. Insulin-like 3  
ISK5. Serine protease inhibitor Kazal-type 5  
KAP0. cAMP-dependent protein kinase type I-alpha regulatory subunit  
KAP1. cAMP-dependent protein kinase type I-beta regulatory subunit  
KAP2. cAMP-dependent protein kinase type II-alpha regulatory subunit  
KAP3. cAMP-dependent protein kinase type II-beta regulatory subunit  
KAPCA. cAMP-dependent protein kinase catalytic subunit alpha  
KAPCB. cAMP-dependent protein kinase catalytic subunit beta  
KAPCG. cAMP-dependent protein kinase catalytic subunit gamma

---

---

KEAP1. Kelch-like ECH-associated protein 1  
KS6A4. Ribosomal protein S6 kinase alpha-4  
KS6A5. Ribosomal protein S6 kinase alpha-5  
LKHA4. Leukotriene A-4 hydrolase  
LOX12. Polyunsaturated fatty acid lipoxygenase ALOX12  
LOX15. Polyunsaturated fatty acid lipoxygenase ALOX15  
LOX5. Polyunsaturated fatty acid 5-lipoxygenase  
LSHB. Lutropin subunit beta  
LSHR. Lutropin-choriogonadotropic hormone receptor  
LTC4S. Leukotriene C4 synthase  
LX15B. Polyunsaturated fatty acid lipoxygenase ALOX15B  
MC3R. Melanocortin receptor 3  
MC4R. Melanocortin receptor 4  
MC5R. Melanocortin receptor 5  
METRL. Meteorin-like protein  
MFS10. Major facilitator superfamily domain-containing protein 10  
MIF. Macrophage migration inhibitory factor  
MK14. Mitogen-activated protein kinase 14  
MSHR. Melanocyte-stimulating hormone receptor  
MXRA5. Matrix-remodeling-associated protein 5  
MY18A. Unconventional myosin-XVIIIa  
MYH9. Myosin-9  
NAL10. NACHT, LRR and PYD domains-containing protein 10  
NEU2. Vasopressin-neurophysin 2-copeptin  
NF2L2. Nuclear factor erythroid 2-related factor 2  
NFKB1. Nuclear factor NF-kappa-B p105 subunit  
NLRC3. NLR family CARD domain-containing protein 3  
NPS. Neuropeptide S  
NPSR1. Neuropeptide S receptor  
NR1H2. Oxysterols receptor LXR-beta  
NR1H4. Bile acid receptor  
NR5A2. Nuclear receptor subfamily 5 group A member 2  
P2Y11. P2Y purinoceptor 11  
PA2GD. Group IID secretory phospholipase A2  
PACA. Pituitary adenylate cyclase-activating polypeptide  
PACR. Pituitary adenylate cyclase-activating polypeptide type I receptor  
PAFA. Platelet-activating factor acetylhydrolase  
PD2R. Prostaglandin D2 receptor  
PDE4B. cAMP-specific 3',5'-cyclic phosphodiesterase 4B  
PE2R2. Prostaglandin E2 receptor EP2 subtype  
PE2R4. Prostaglandin E2 receptor EP4 subtype  
PGDH. 15-hydroxyprostaglandin dehydrogenase  
PGH1. Prostaglandin G/H synthase 1

---

---

PGH2. Prostaglandin G/H synthase 2  
PI2R. Prostacyclin receptor  
PK3CG. Phosphatidylinositol 4,5-bisphosphate 3-kinase catalytic subunit gamma isoform  
PLK2. Serine/threonine-protein kinase PLK2  
PRKX. cAMP-dependent protein kinase catalytic subunit PRKX  
PTGR1. Prostaglandin reductase 1  
PTH1R. Parathyroid hormone/parathyroid hormone-related peptide receptor  
PTH2R. Parathyroid hormone 2 receptor  
PTHR. Parathyroid hormone-related protein  
PTHY. Parathyroid hormone  
PXL2A. Peroxiredoxin-like 2A  
RAMP1. Receptor activity-modifying protein 1  
RAMP2. Receptor activity-modifying protein 2  
RAMP3. Receptor activity-modifying protein 3  
RARR2. Retinoic acid receptor responder protein 2  
REL2. Prorelaxin H2  
REL3. Relaxin-3  
RHDF2. Inactive rhomboid protein 2  
RORA. Nuclear receptor ROR-alpha  
RXFP1. Relaxin receptor 1  
RXFP2. Relaxin receptor 2  
RXRA. Retinoic acid receptor RXR-alpha  
S10A8. Protein S100-A8  
SBNO2. Protein strawberry notch homolog 2  
SC5A8. Sodium-coupled monocarboxylate transporter 1  
SCTR. Secretin receptor  
SECR. Secretin  
SG3A2. Secretoglobulin family 3A member 2  
SLIB. Somatoliberin  
SLPI. Antileukoproteinase  
T22D3. TSC22 domain family protein 3  
TAAR1. Trace amine-associated receptor 1  
TAAR2. Trace amine-associated receptor 2  
TAAR3. Putative trace amine-associated receptor 3  
TAAR5. Trace amine-associated receptor 5  
TAAR6. Trace amine-associated receptor 6  
TAAR8. Trace amine-associated receptor 8  
TAAR9. Trace amine-associated receptor 9  
TIE2. Angiopoietin-1 receptor  
TIP39. Tuberoinfundibular peptide of 39 residues  
TNIP1. TNFAIP3-interacting protein 1  
TREM2. Triggering receptor expressed on myeloid cells 2  
TSHB. Thyrotropin subunit beta

---

---

TSHR. Thyrotropin receptor

TTP. mRNA decay activator protein ZFP36

V2R. Vasopressin V2 receptor

VIP. VIP peptides

VIPR1. Vasoactive intestinal polypeptide receptor 1

VIPR2. Vasoactive intestinal polypeptide receptor 2

ZC12A. Endoribonuclease ZC3H12A

---
